# Supplementary material for: Deciphering triterpenoid saponin biosynthesis by leveraging transcriptome response to methyl jasmonate elicitation in Saponaria vaccaria
Source: PubMed Central journal article supplement (PMC10625584; doi:10.1038/s41467-023-42877-0), 2023-11-04
Supplement: 41467_2023_42877_MOESM1_ESM.pdf [file 41467_2023_42877_MOESM1_ESM.pdf]

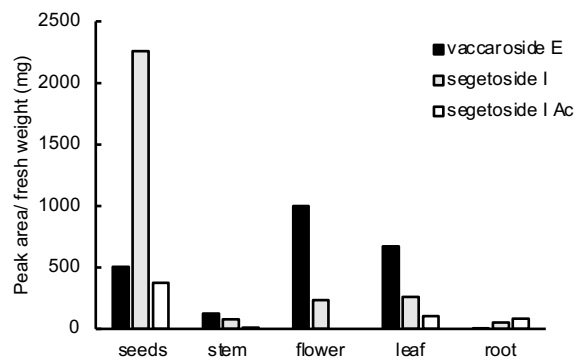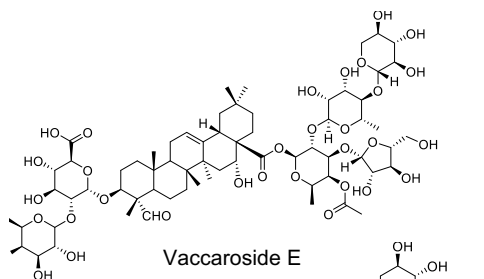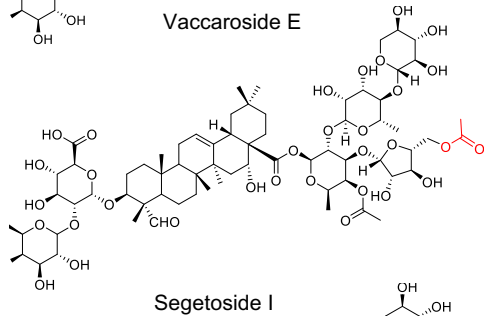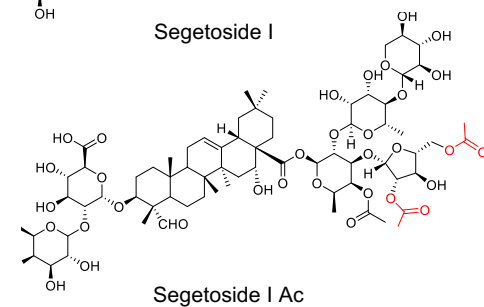

**Supplementary Figure 1.** Detection of target mass of vaccaroside E, segetoside I and segetoside I Ac by LC-MS in different tissues of *S. vaccaria*. Source data are provided as a Source Data file.

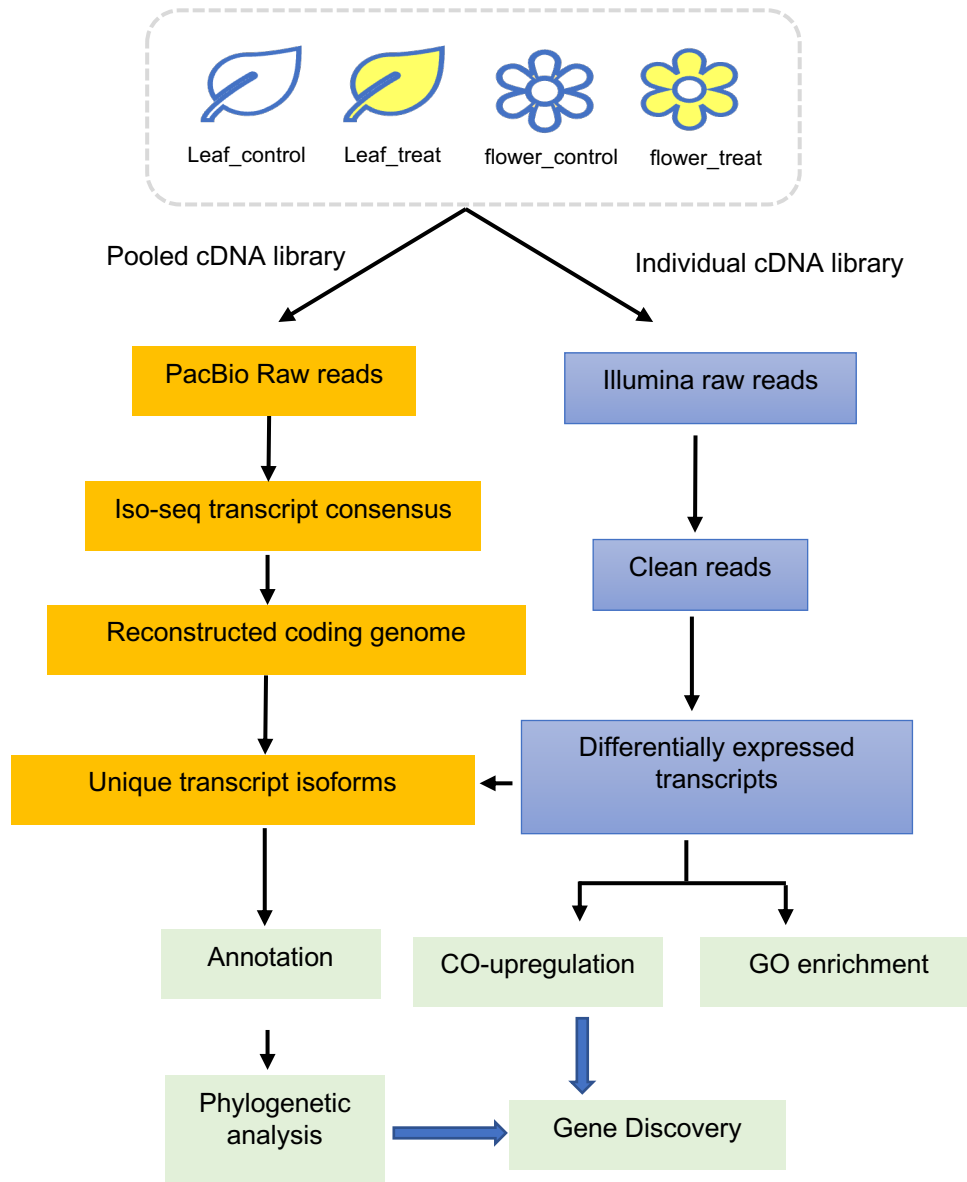

**Supplementary Figure 2.** Schematic representation of pipeline used for hybrid sequencing data analysis for discovery of genes in saponin biosynthesis pathway in *S. vaccaria*.

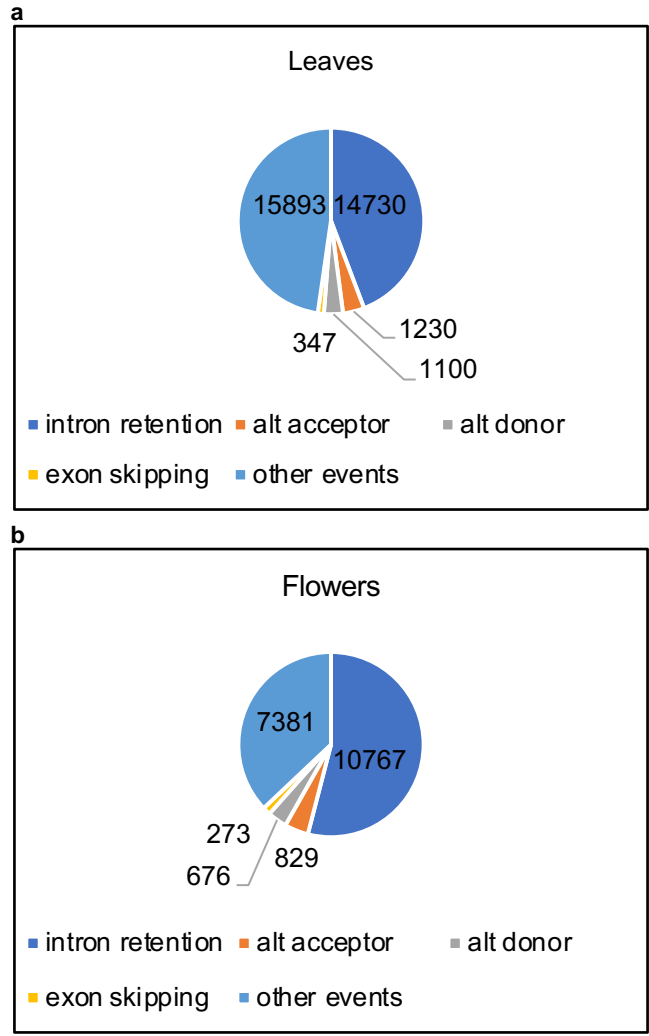

**Supplementary Figure 3.** Alternative splicing events detected in leaves (**a**) and flowers (**b**) of *S. vaccaria*. Source data are provided as a Source Data file.

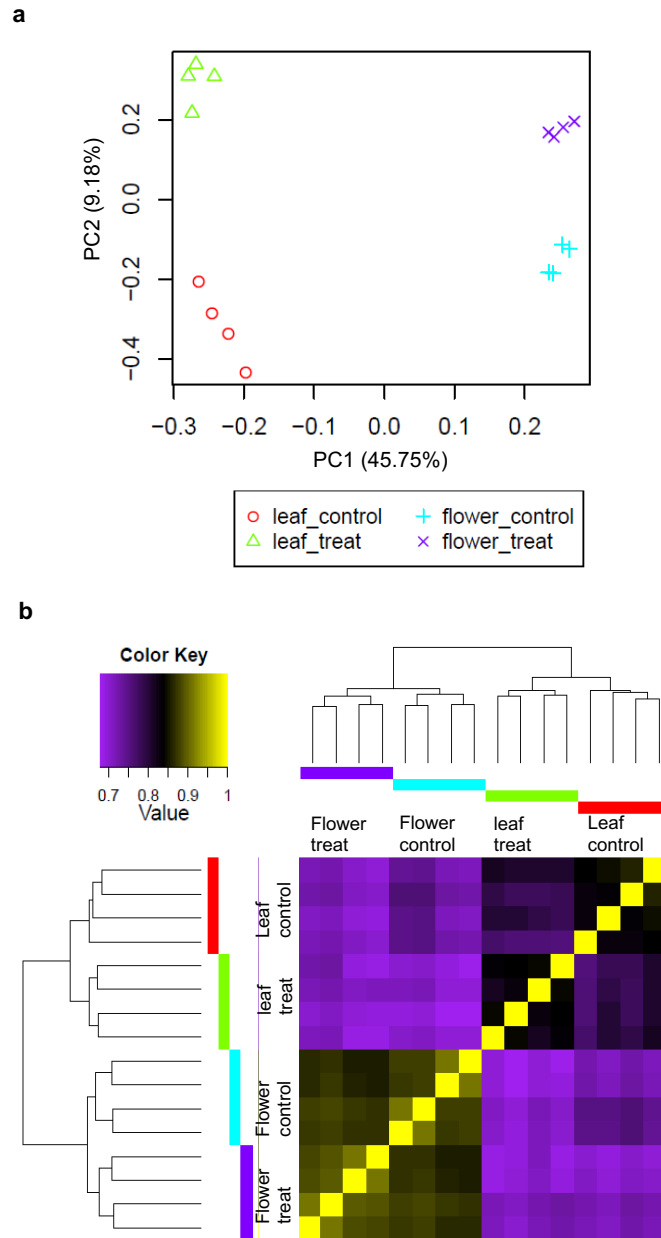

**Supplementary Figure 4. Sample replicates correlation analysis of transcript expression profiles.** (a) PCA plot of transcript counts of biological replicates across all samples. (b) Pearson correlation heatmap of transcript counts of biological replicates across all samples.

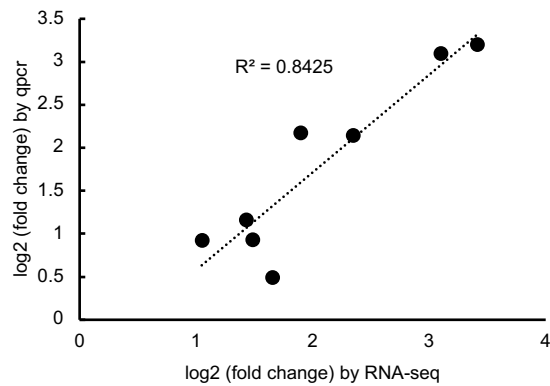

**Supplementary Figure 5.** Correlation of gene expression fold change between qPCR and RNA-seq ( $R^2 = 0.84$ ) based on leaf and flower expression of *3-hydroxy-3-methylglutaryl coenzyme A reductase (HMGR)*, *mevalonate diphosphate decarboxylase (MVD)*, *squalene synthase (SQS)*, and  *$\beta$ -amyrin synthase ( $\beta$ AS)*, which are genes involved in saponin biosynthesis. Source data are provided as a Source Data file.

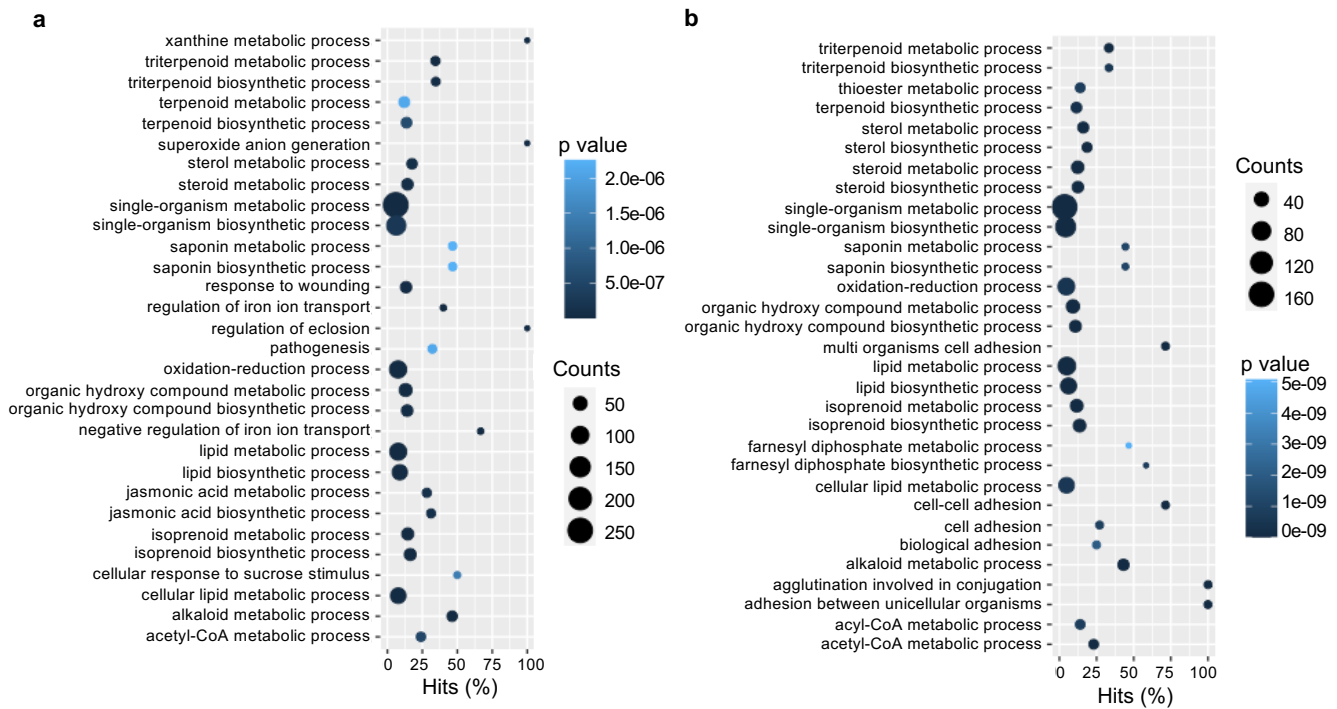

**Supplementary Figure 6. GO-enrichment analysis of upregulated genes in leaves (a) and flowers (b) of *S. vaccaria* under MeJA treatment. Y-axis: enriched GO term; x-axis: the percentile of the number of observed genes divided by the number of genes from each GO category.**

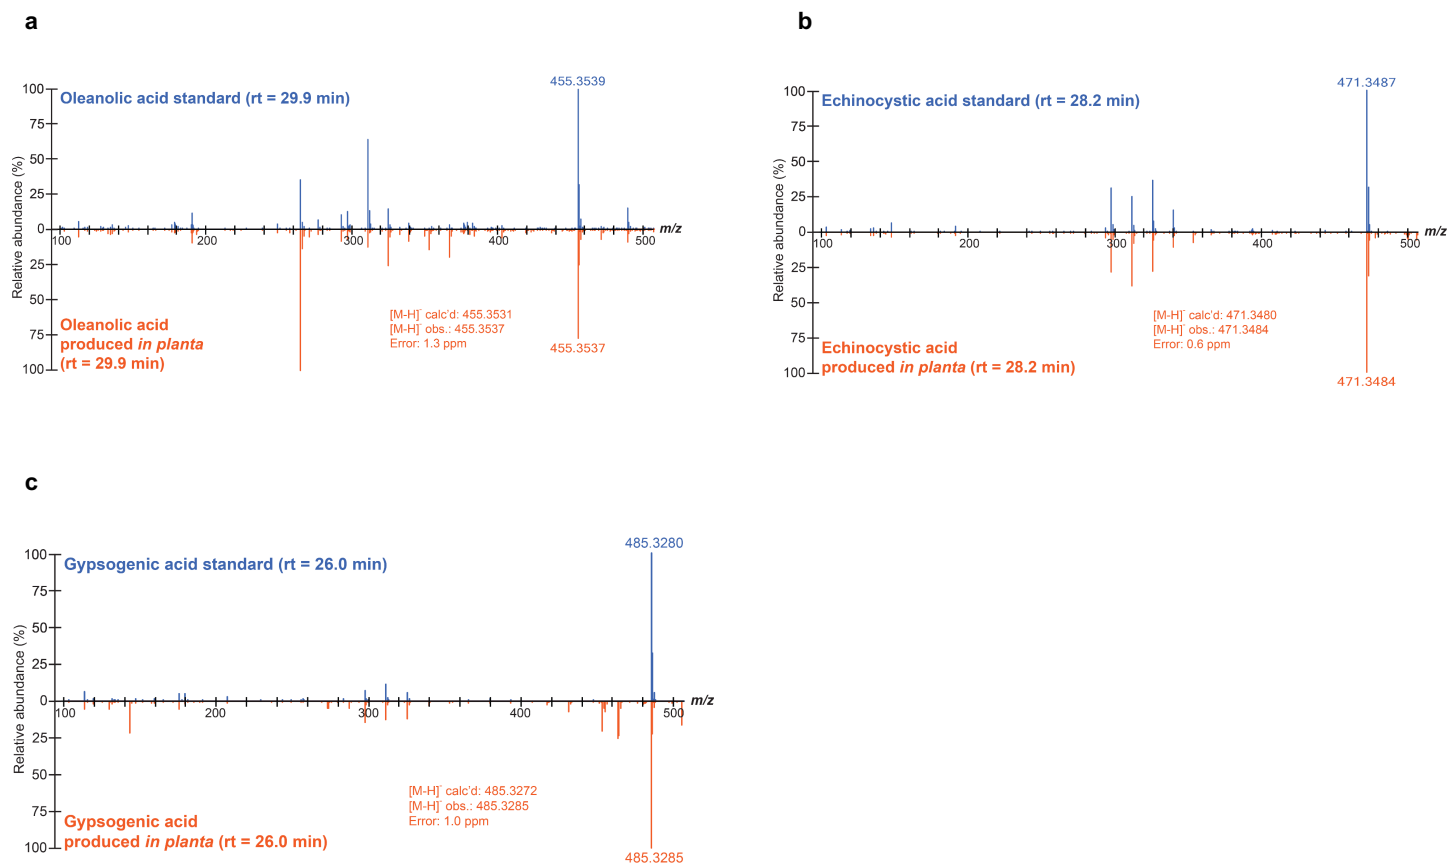

**Supplementary Figure 7:** High resolution MS of oleanolic acid (**a**), echinocystic acid (**b**), and gypsogenic acid (**c**) produced in *Nicotiana benthamiana* transiently expressing SvβAS and CYP candidates as indicated. The figure corresponds to Figure 3 in the main text.

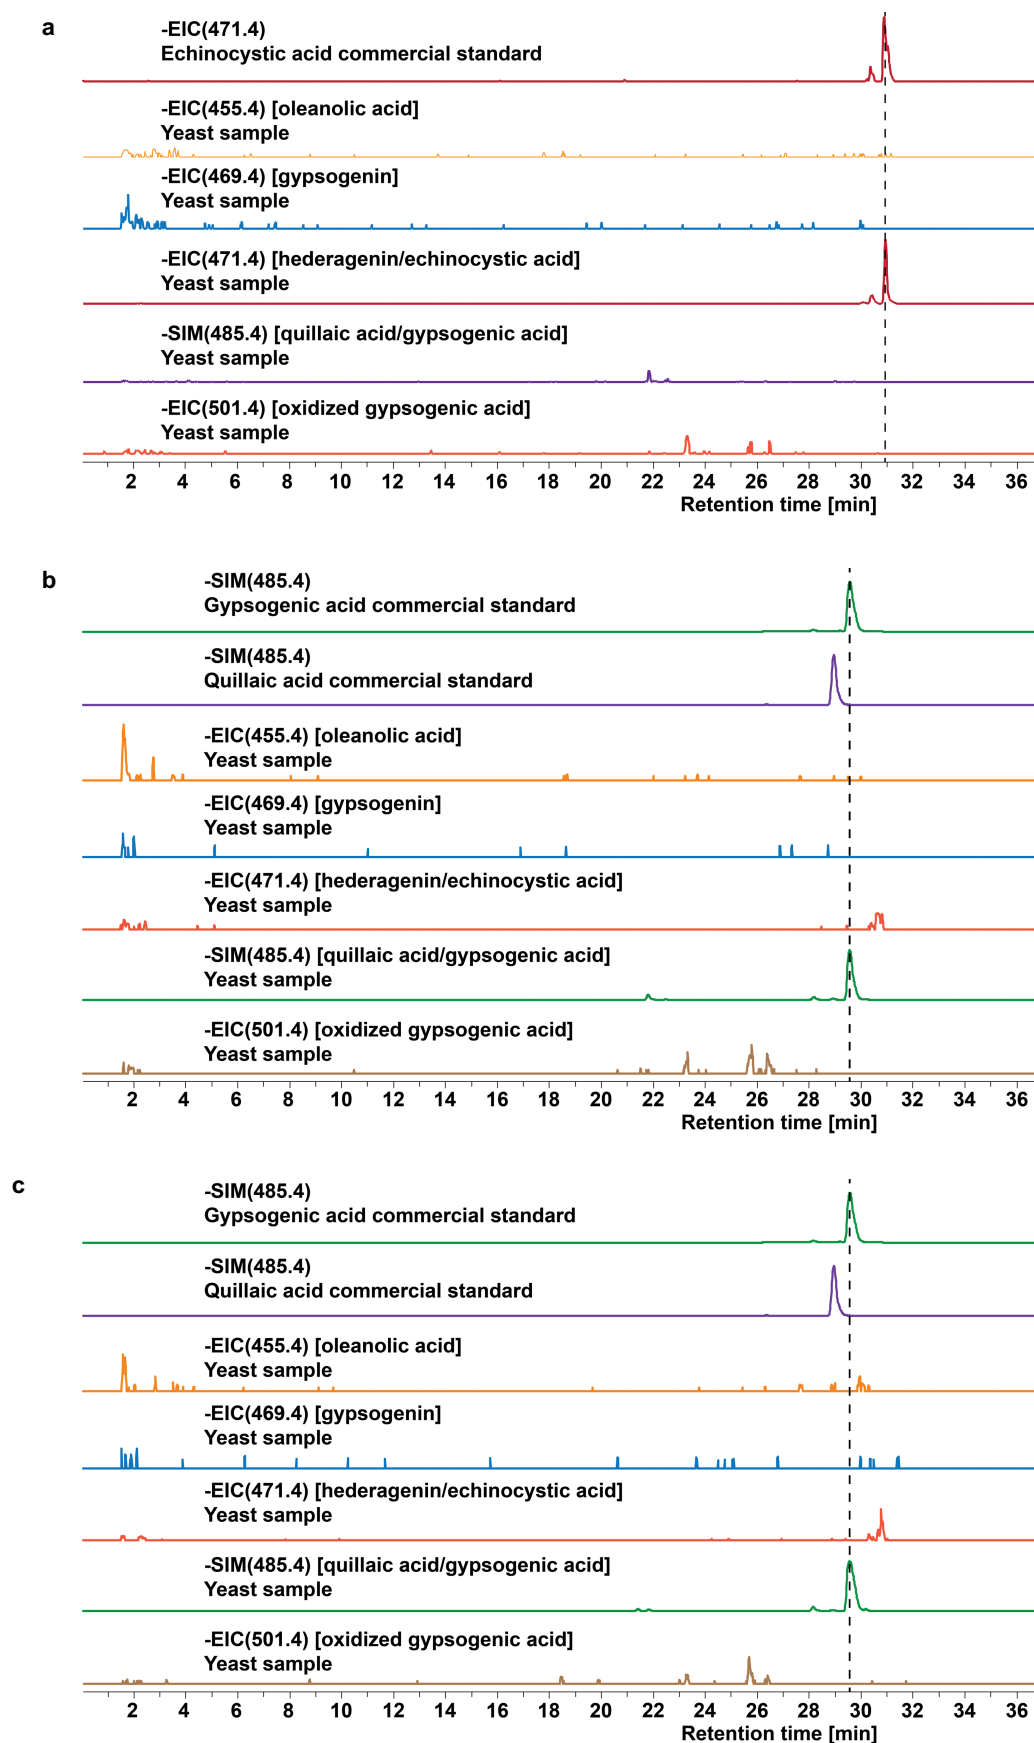

**Supplementary Figure 8. Functional test of SvC28, SvC16, and C23 oxidases in  $\beta$ -amyryn producing yeast. (a) Yeast expressing the SvC16 oxidase in addition to SvC28 oxidase and *AtATR1* on plasmid produce only echinocystic acid. Yeast expressing the SvC23 oxidase-1 (b) or SvC23 oxidase-2 (c) in addition to only SvC28 oxidase and *AtATR1* on plasmid produce exclusively gypsogenic acid.**



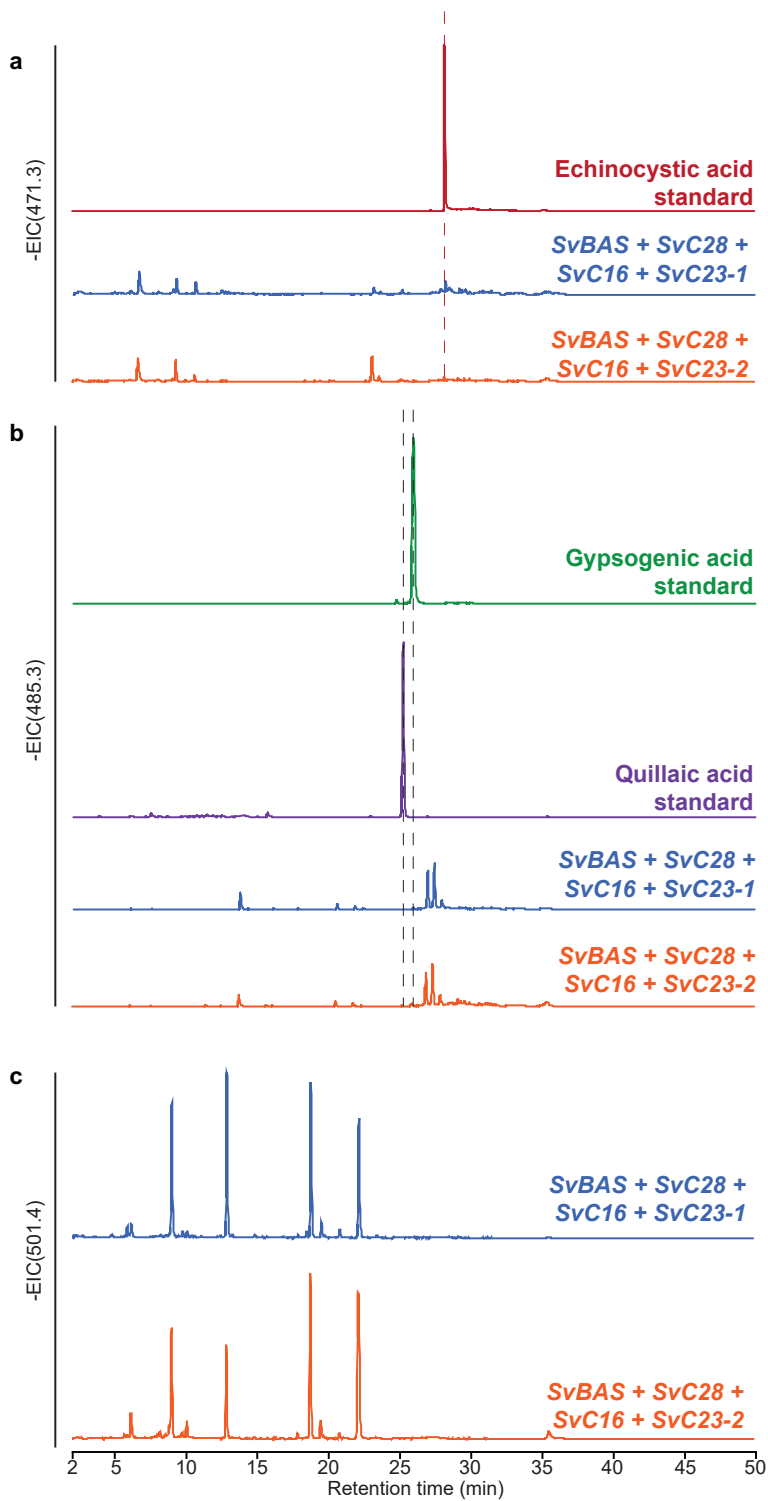

**Supplementary Figure 9. Combined expression of SvC28, SvC16, and SvC23 oxidases in *N. benthamiana*.** EIC of echinocystic acid (a), quillaic acid / gypsogenic acid (b), and oxidized gypsogenic acid (c) in leaves expressing Sv $\beta$ AS, SvC28, and SvC16 together with SvC23-1 or SvC23-2.

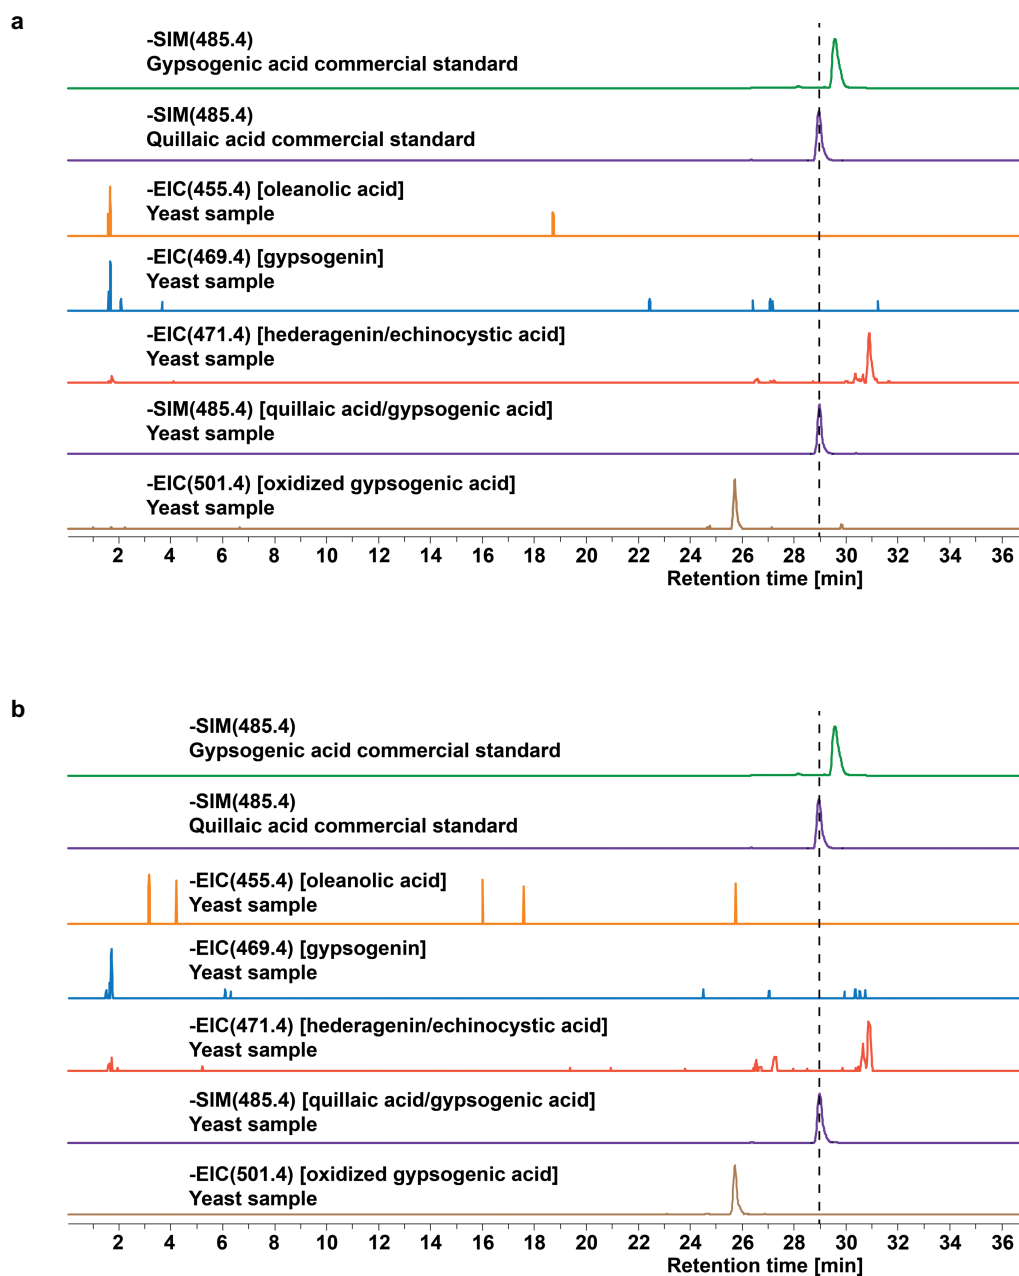

**Supplementary Figure 10.** Yeast expressing the *SvC23 oxidase-1* (a) or *SvC23 oxidase-2* (b) in addition to *SvC28* and *SvC16* oxidases and *AtATR1* on plasmid produce predominantly quillaic acid with smaller amounts of oxidized gypsogenic acid and echinocystic acid detectable.

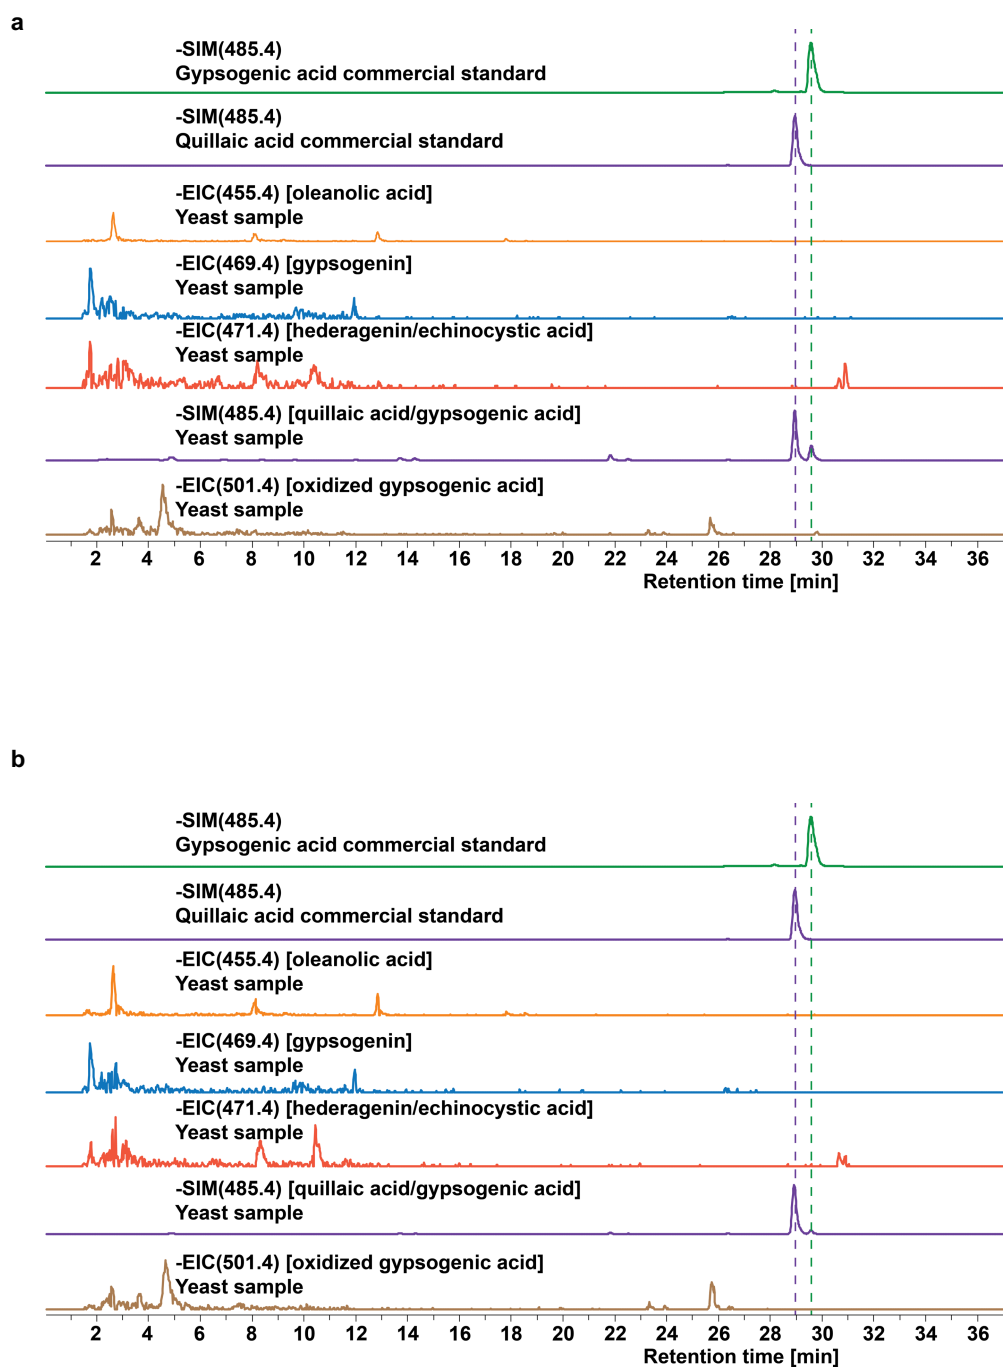

**Supplementary Figure 11.** Yeast expressing the *SvC23 oxidase-1* (a) or *SvC23 oxidase-2* (b) in addition to *SvC28* and *SvC16* oxidases and *AtATR1* integrated into the yeast genome produces predominantly quillaic acid as well as a small amount of gypsogenic acid.

a Tree scale: 0.1

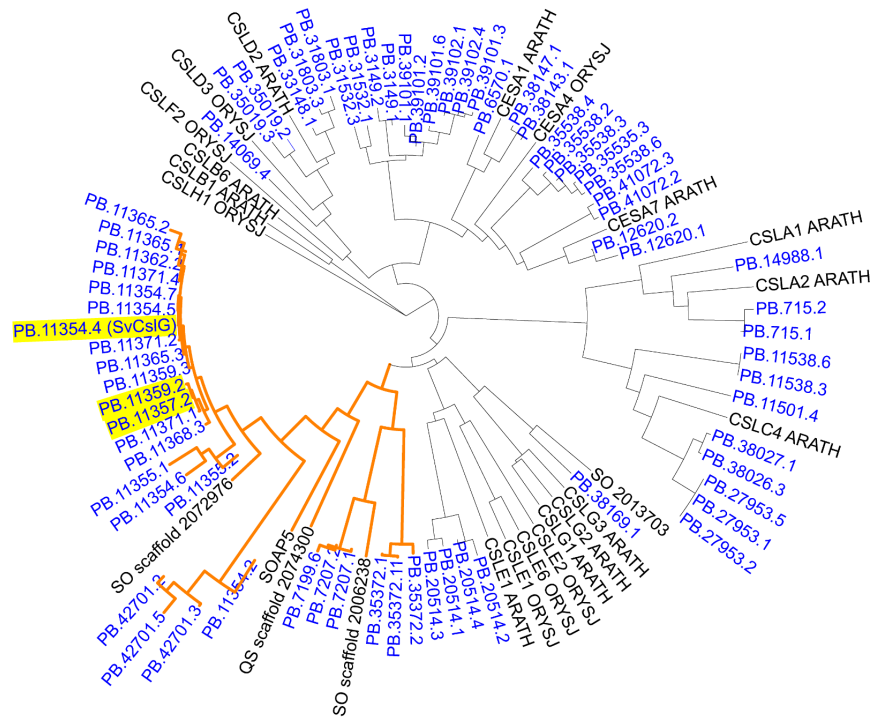

b

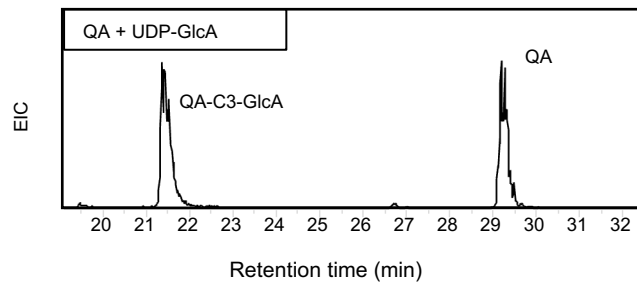

**Supplementary Figure 12. Identification of quillaic acid-C3-glucuronosyltransferase.**

(a) A neighbor-joining tree (1,000 bootstrap replicates) of Csl genes of *S.vaccaria* and other plants. Gene names in blue represent *S.vaccaria* Csl candidates. Yellow background highlight indicates co-expression with  $\beta$  amyrin synthase. Only the transcript of SvCs/G (PB.11354.4) encodes a full-length protein among co-expressed genes. Genes from *Arabidopsis thaliana* (ARATH) and *Oryza Sativa subsp. Japonica* (ORYSJ) are designated as CSL class and species name. Accession numbers of Csl proteins are in Supplementary Table 2 and sequences of *S. vaccaria* proteins in the tree are in Supplementary Data 1. (b) EIC of quillaic acid and quillaic acid 3-O-glucuronide (QA-3-GlcA) of SvCs/G in vitro enzyme assay with QA and UDP-GlcA as substrates.

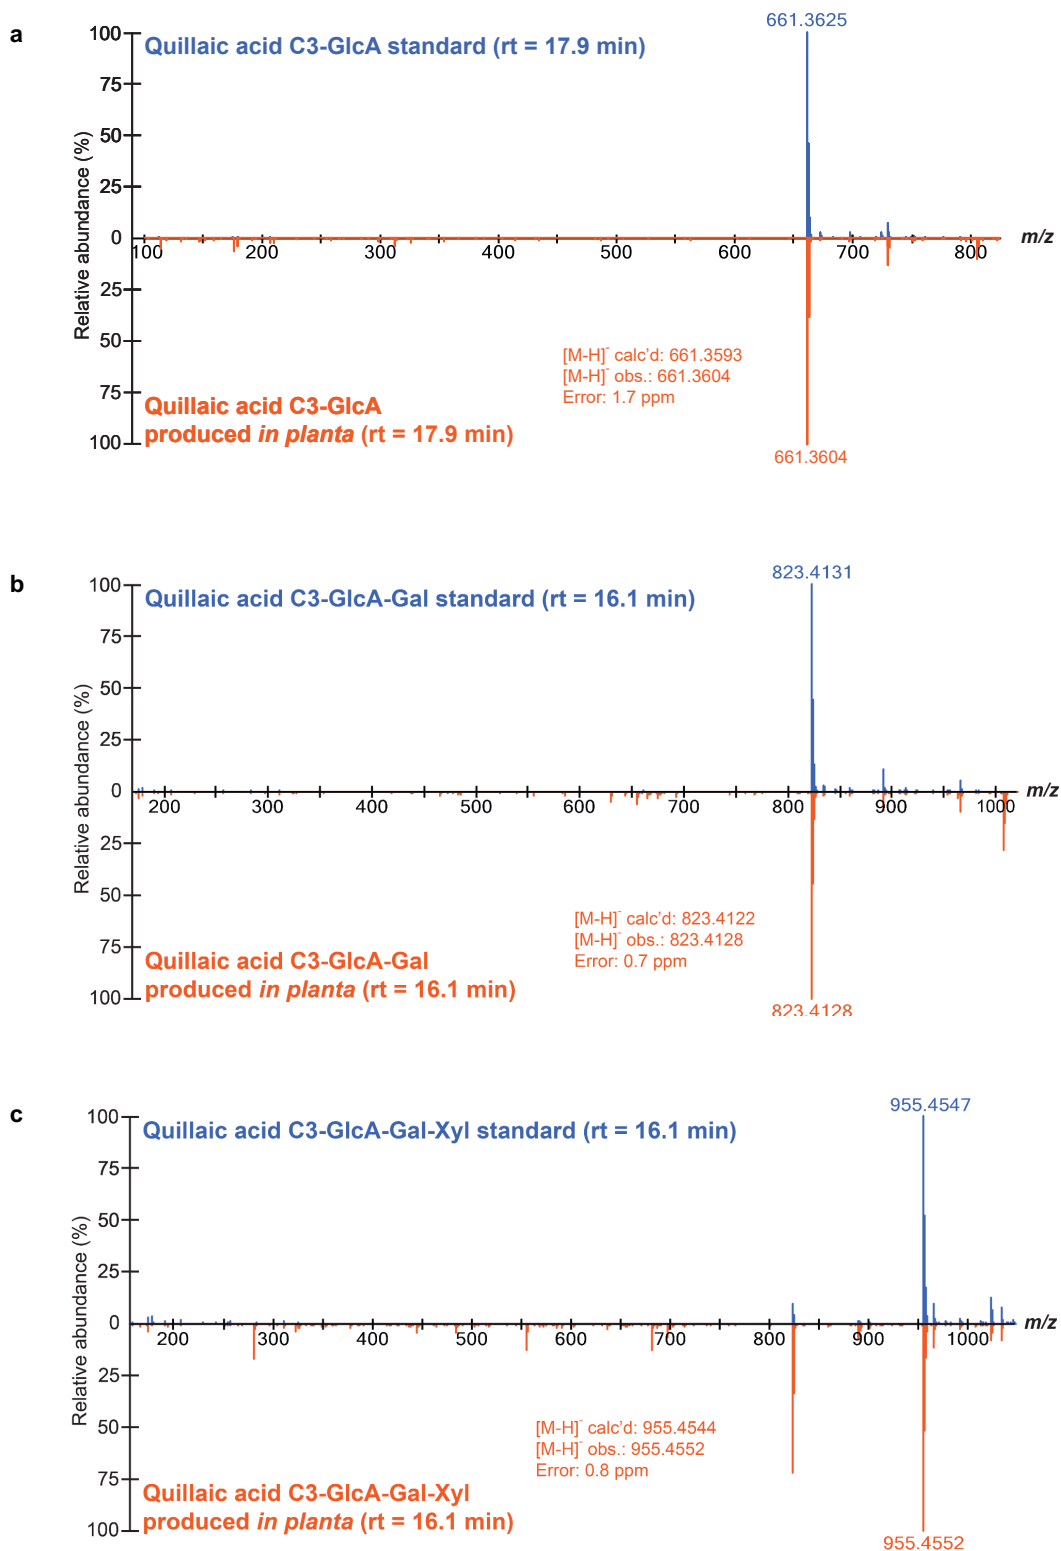

**Supplementary Figure 13.** High resolution MS of QA-C3-GlcA, QA-C3-GlcA-Gal and QA-C3-GlcA-Gal-Xyl from plants transiently expressing (a) *SvCs/G*, (b) *SvCs/G* + *SvGal/T*, and (c) *SvCs/G* + *SvGal/T* + *SvC3Xyl/T* and infiltrated with QA solution. The figure shows mass spectra corresponding to Figure 5 in the main text.

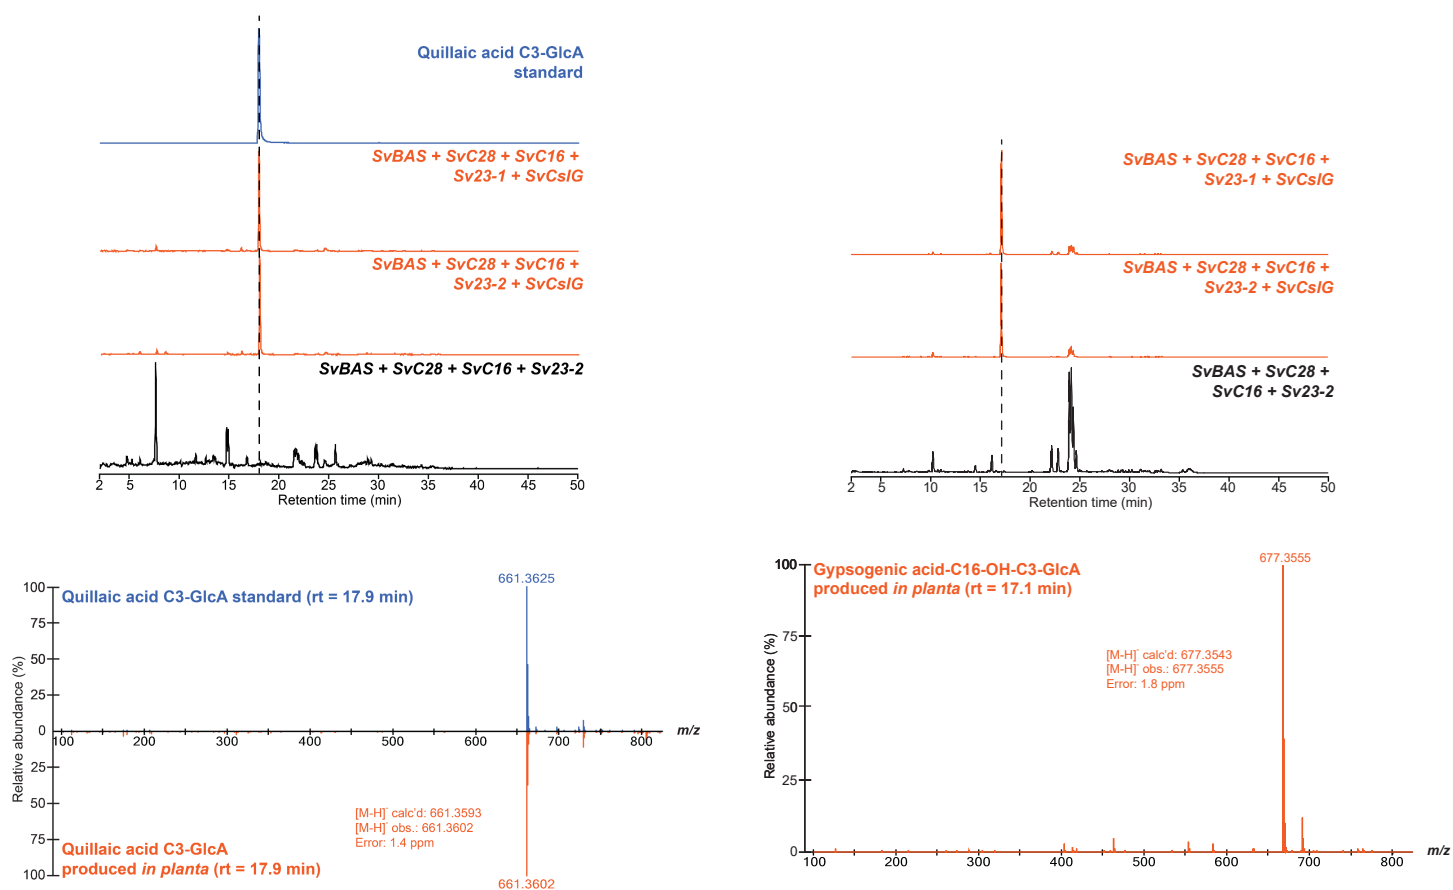

**Supplementary Figure 14.** EIC and high resolution MS of QA-C3-GlcA (a) and GA-C16-OH-C3-GlcA (b) in *N. benthamiana* expressing Sv $\beta$ AS, SvC28, SvC16, and SvC23-1/2 together with SvCsIG or p19 strain. No standard is available for GA-C16-OH-C3-GlcA. The data corresponds to Figure 6 in the main.

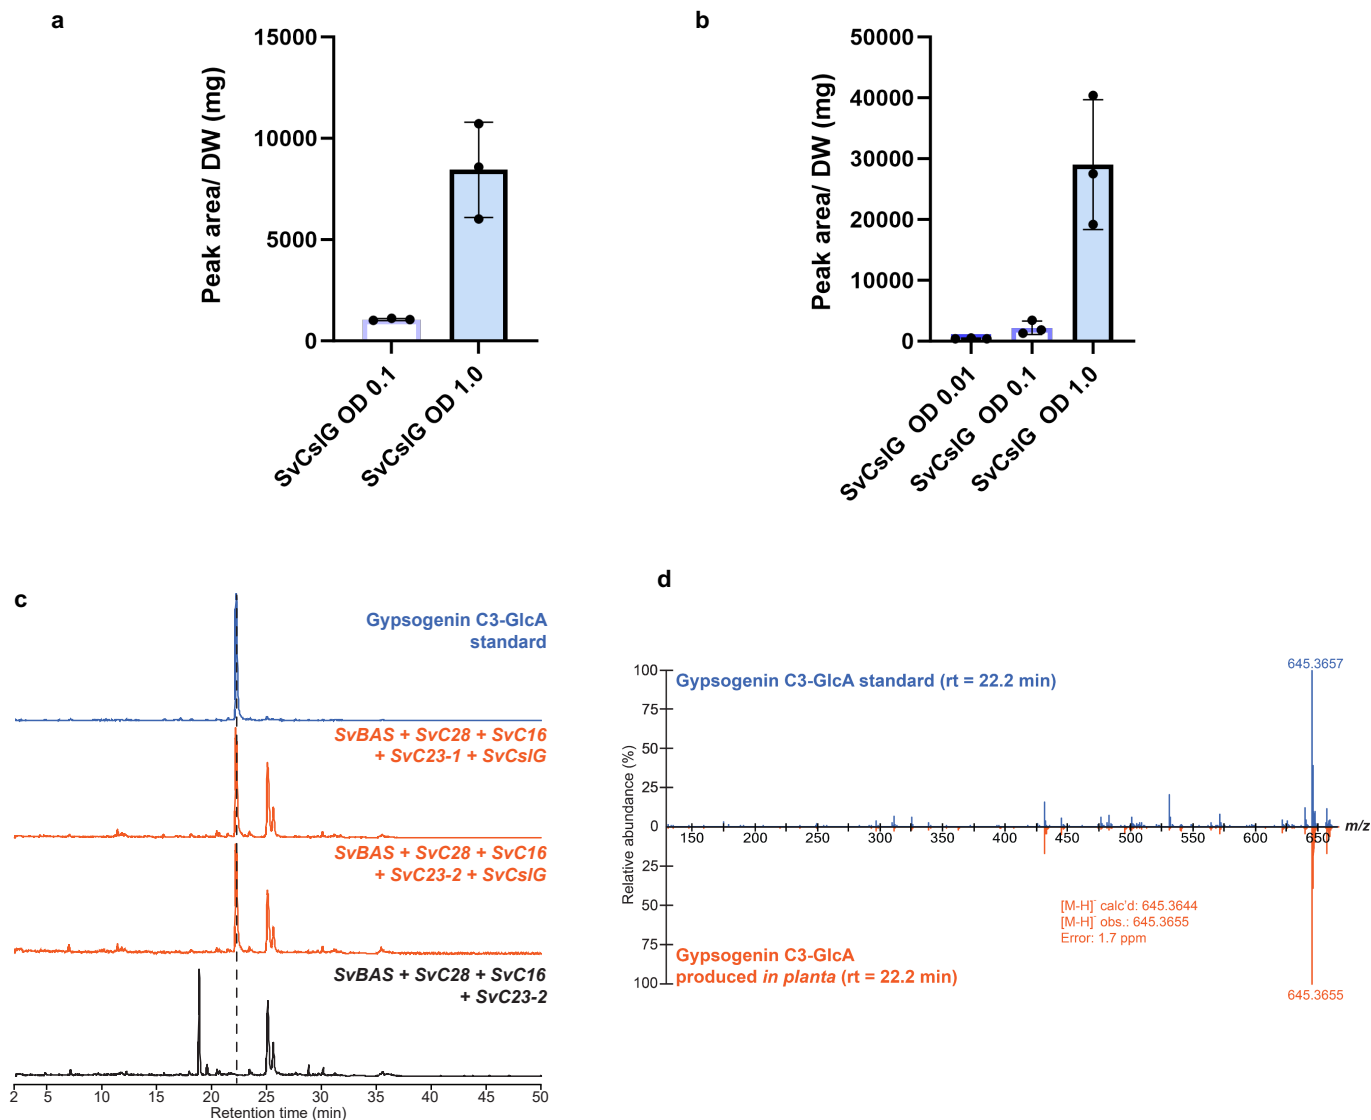

**Supplementary Figure 15. SvCslG increases the production of gypsogenin-C3-GlcA.** Different OD levels of *Agrobacterium tumefaciens* harboring SvCslG were individually co-infiltrated with *A. tumefaciens* harboring SvβAS, SvC28, SvC16 and SvC23-1 (a) and SvC23-2 (b). Error bars indicate mean ± SD (n=3 biologically independent samples). Source data and test statistics are provided as a Source Data file. (c) EIC for the different enzyme combinations. (d) Mass spectrum of gypsogenin C3-GlcA.

Tree scale: 0.1

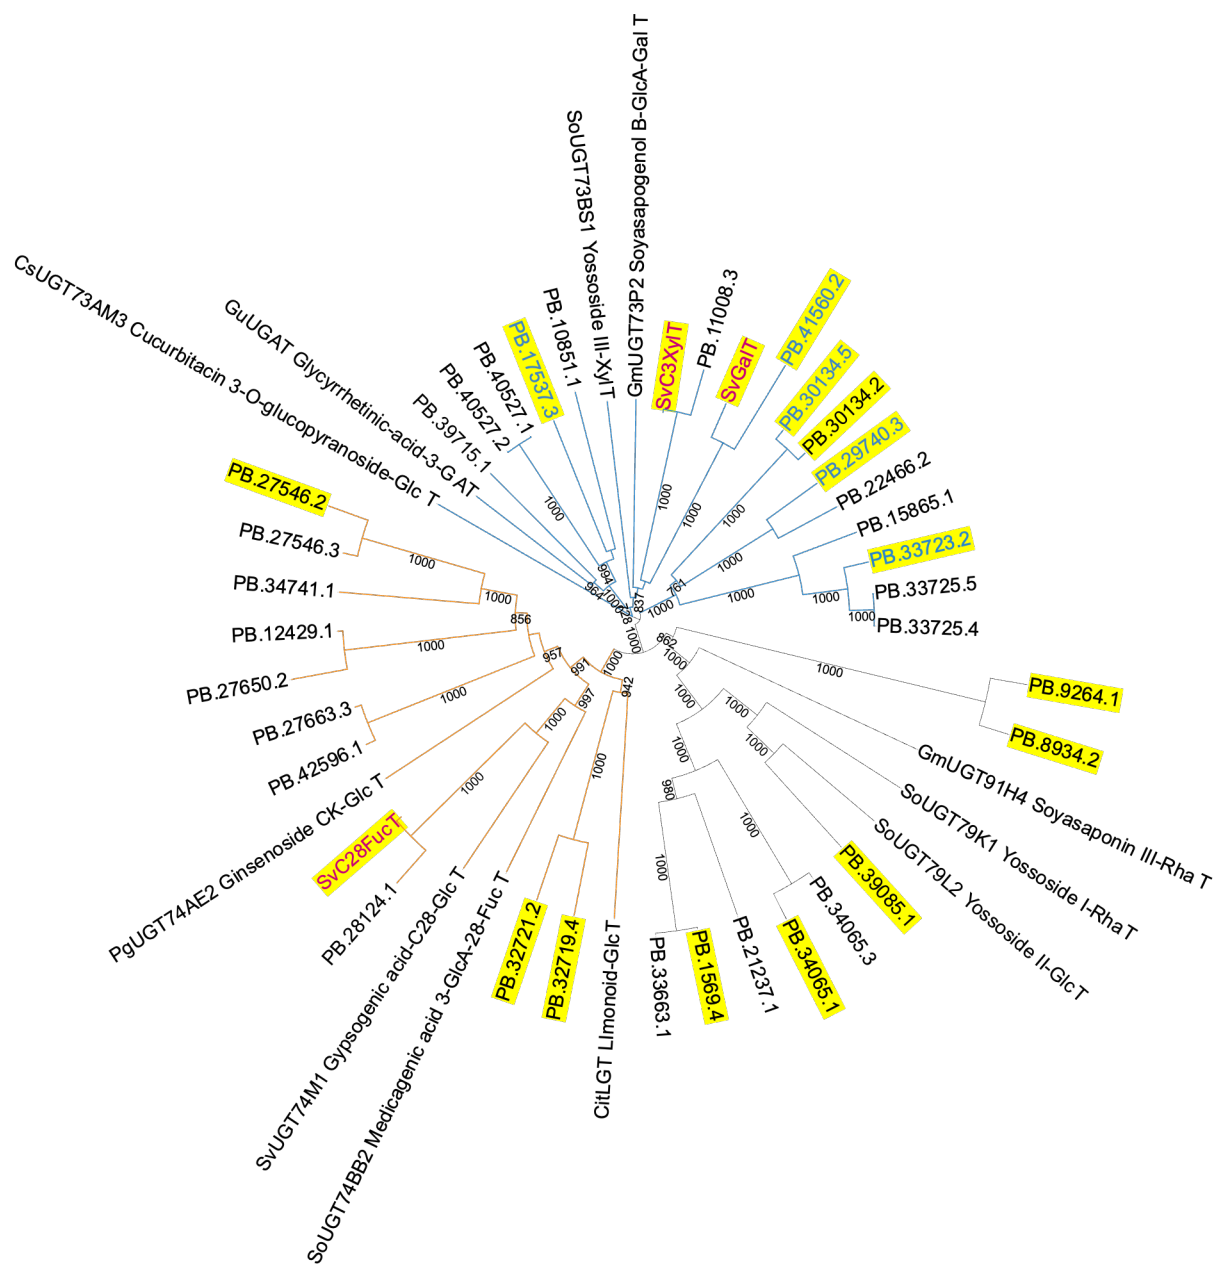

**Supplementary Figure 16. Neighbor-joining tree (1,000 bootstrap replicates) of SvUGTs and other characterized GT1s glycosylating triterpenoids.** The identified SvGalT, SvC3XylT, and SvC28FucT are shown in red letter. Five candidates of SvGalT that have been functionally tested are shown in blue. Yellow highlight indicates co-expression with Sv $\beta$ AS. Genes from other plants are designated as name followed by function description. Sequences of *S. vaccaria* proteins in the tree are in Supplementary Data 1 and accession numbers of GT1s from other species are in Supplementary Table 2 and



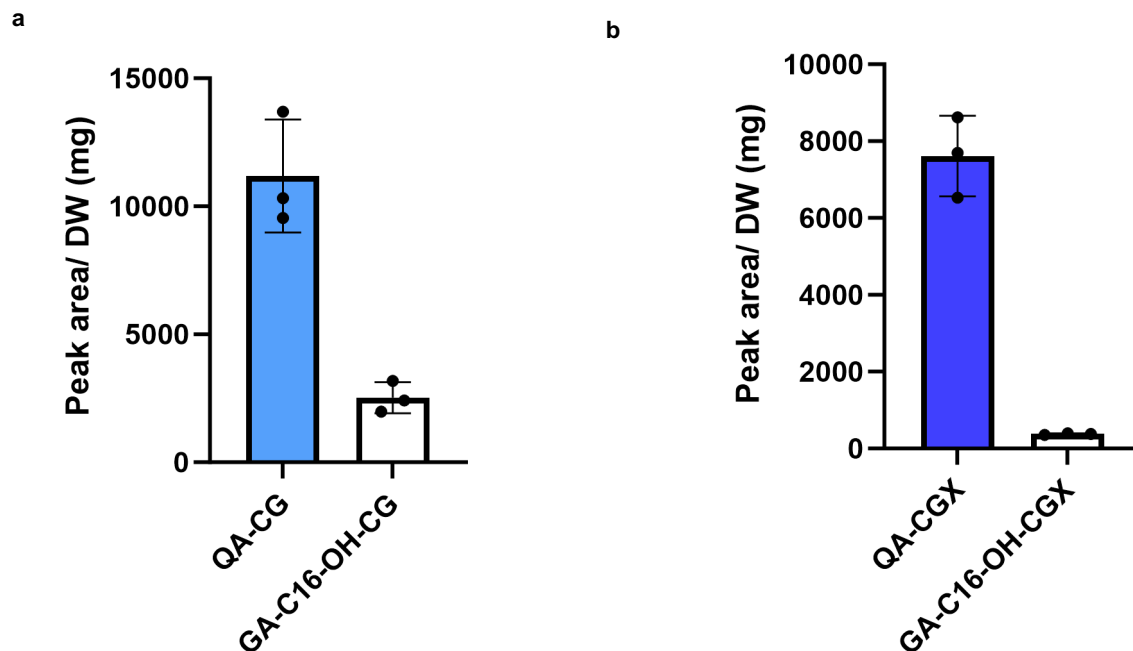

**Supplementary Figure 17. SvGalT and SvC3XylT further boost the C3 glycosylation of C23 aldehyde.** (a) formation of QA-C3-GlcA-Gal and GA-C16-OH-C3-GlcA-Gal in *N. benthamiana* expressing Sv $\beta$ AS, SvC28, SvC16, SvC23-1, and SvGalT. (b) Production of QA-C3-GlcA-Gal-Xyl and GA-C16-OH-C3-GlcA-Gal-Xyl in *N. benthamiana* expressing Sv $\beta$ AS, SvC28, SvC16, SvC23-1, SvGalT, and SvXylT. Error bars indicate mean  $\pm$  SD (n=3 biologically independent samples). Source data and test statistics are provided as a Source Data file.



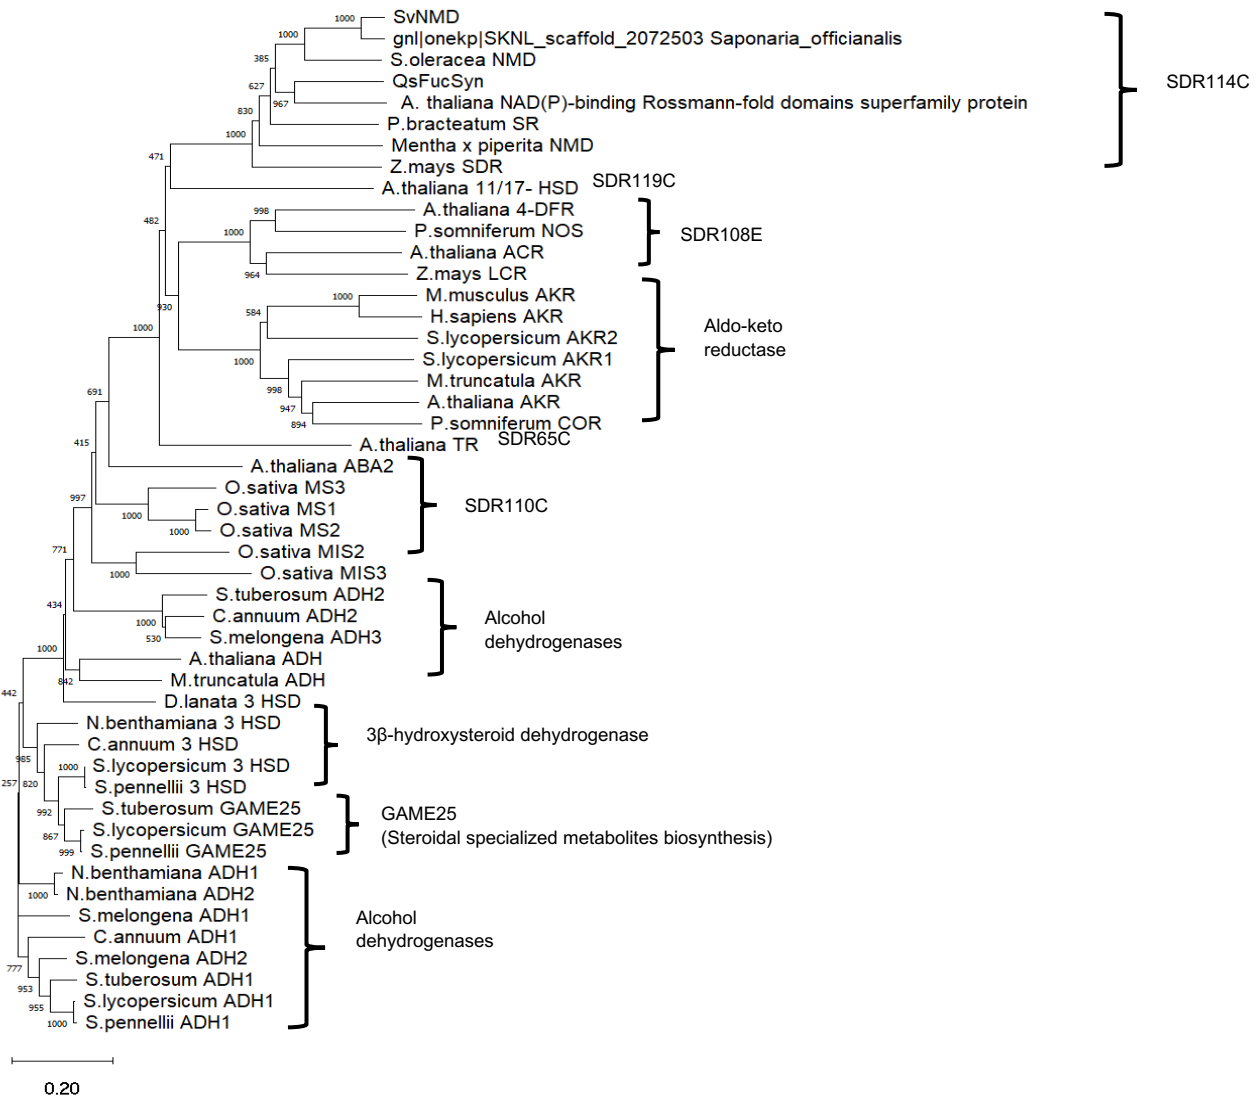

**Supplementary Figure 19. Neighbor-joining tree (1,000 bootstrap replicates) of SvNMD and other short-chain dehydrogenases/reductases.** The coding sequence of SvNMD is in Supplemental Data 2 and the remaining amino acid sequences are provided in Supplemental Data 3.

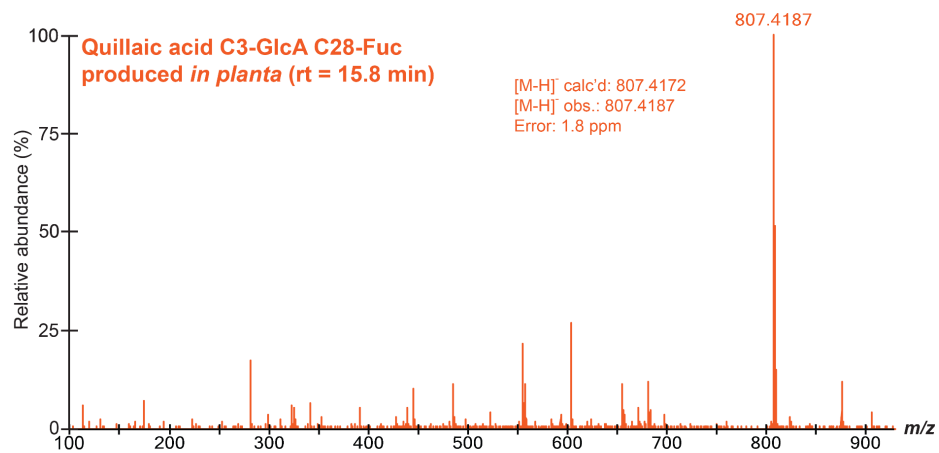

**Supplementary Figure 20.** Mass spectrum of QA C3-GlcA C28-Fuc produced in planta (no standard is available). The data corresponds to Figure 7 in the main text.

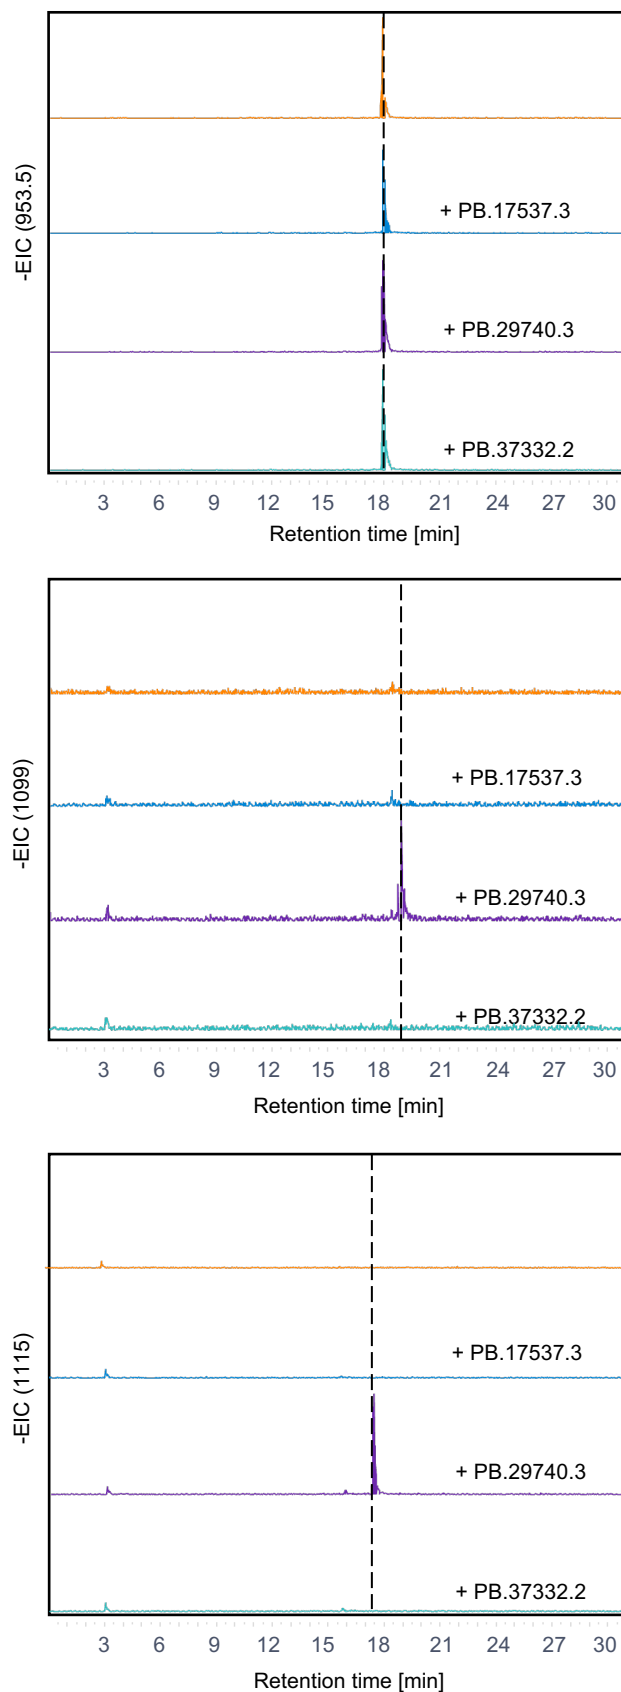

**Supplementary Figure 21.** EIC of (a) QA-C3-GlcA-C28-Fuc-Rha ( $m/z$  953), (b) QA-C3-GlcA-C28-Fuc-Rha-deoxyhexose ( $m/z$  1099), and (c) QA-C3-GlcA-C28-Fuc-Rha-hexose ( $m/z$  1115) in *N. benthamiana* transiently expressing Sv $\beta$ AS, SvC28, QsC16, QsC23, SvCsIG, Sv46DH, SvNMD, SvC28FucT, and QsC28RhaT only (control) or in addition to individual SvC28 GT candidate PB. 17537.3 (+ PB. 17537.3), PB. 29740.3 (+ PB. 29740.3), or PB. 33723.2 (+ PB. 33723.2).

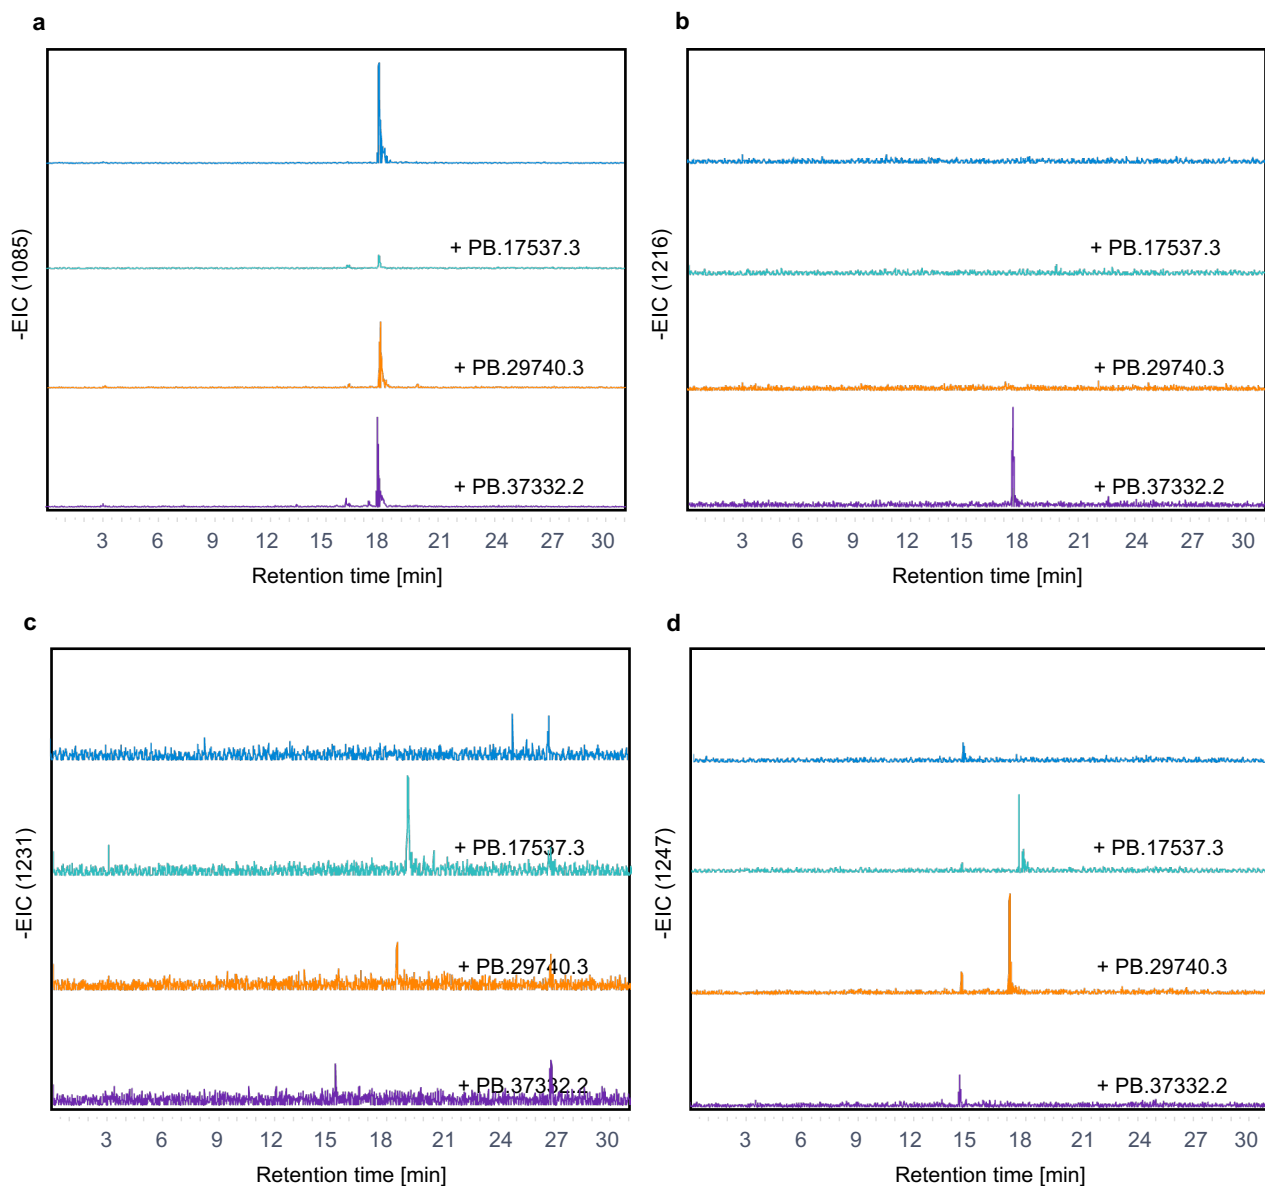

**Supplementary Figure 22.** EIC of (a) QA-C3-GlcA-C28-Fuc-Rha-Xyl ( $m/z$  1085), (b) QA-C3-GlcA-C28-Fuc-Rha-Xyl-pentose ( $m/z$  1217), (c) QA-C3-GlcA-C28-Fuc-Rha-Xyl-deoxyhexose ( $m/z$  1231), and (d) QA-C3-GlcA-C28-Fuc-Rha-Xyl-hexose ( $m/z$  1247) in *N. benthamiana* transiently expressing *SvβAS*, *SvCYPC28*, *QsC16*, *QsC23*, *SvCslG*, *Sv46DH*, *SvNMD*, *SvC28FucT*, and *QsC28RhaT* only (control) or in addition to individual SvC28 GT candidate *PB.17537.3* (+ *PB. 17537.3*), *PB. 29740.3* (+ *PB.29740.3*), or *PB.33723.2* (+ *PB.33723.2*).

**Supplementary Table 1. Structure features of major triterpenoid saponins in *S. vaccaria***

| Name                                | Aglycone oxidation  | C23 sugar | C3 sugars                                                                   | C28 sugars                  |
|-------------------------------------|---------------------|-----------|-----------------------------------------------------------------------------|-----------------------------|
| Vaccaroside I <sup>1</sup>          | QA (C23CHO, C16OH)  |           | GlcA, Gal                                                                   | Fuc, Rha, xyl, glc; Fuc     |
| vaccaroside E <sup>2</sup>          | QA (C23CHO, C16OH)  |           | GlcA, Gal                                                                   | Fuc(Ac), Rha, xyl; Araf     |
| New vaccaria saponin 1 <sup>3</sup> | QA (C23CHO, C16OH)  |           | GlcA, Gal, Xyl                                                              | Fuc(Ac), Rha, xyl; Araf     |
| Segetoside I <sup>4</sup>           | QA (C23CHO, C16OH)  |           | GlcA, Gal                                                                   | Fuc(Ac), Rha, xyl; Araf(Ac) |
| New vaccaria saponin 2 <sup>3</sup> | QA (C23CHO, C16OH)  |           | GlcA, Gal, Xyl                                                              | Fuc(Ac), Rha, xyl; Araf(Ac) |
| Segetoside B <sup>5</sup>           | QA (C23CHO, C16OH)  |           | GlcA (Ac), Gal                                                              | Fuc(Ac), Rha, xyl; Araf(Ac) |
| vaccaroside F <sup>1</sup>          | C23-OH, C16-OH      |           | GlcA, Gal                                                                   | Fuc(Ac), Rha, xyl; Araf     |
| vaccaroside H <sup>1</sup>          | C23-OH, C16-H       |           | GlcA, Gal                                                                   | Fuc(Ac), Rha, xyl; Araf     |
| vaccaroside G <sup>1</sup>          | GN (C23CHO, C16-H)  |           | GlcA, Gal                                                                   | Fuc(Ac), Rha, xyl; Araf     |
| New vaccaria saponin 3 <sup>3</sup> | GN (C23CHO, C16-H)  |           | GlcA, Gal, Xyl                                                              | Fuc(Ac), Rha, xyl; Araf     |
| Segetoside H <sup>2</sup>           | GN (C23CHO, C16-H)  |           | GlcA, Gal                                                                   | Fuc(Ac), Rha, xyl; Araf(Ac) |
| New vaccaria saponin 4 <sup>3</sup> | GN (C23CHO, C16-H)  |           | GlcA, Gal, Xyl                                                              | Fuc(Ac), Rha, xyl; Araf(Ac) |
| Segetoside G <sup>6</sup>           | GN (C23CHO, C16-H)  |           | GlcA(CH <sub>3</sub> CH <sub>2</sub> CH <sub>2</sub> CH <sub>2</sub> ), Gal | Fuc(Ac), Rha, xyl; Araf     |
| segetoside C <sup>7</sup>           | GA (C23COOH, C16-H) |           | H                                                                           | G,G',G'',G(Ac)              |
| vaccaroid B <sup>8</sup>            | GA (C23COOH, C16-H) |           | H                                                                           | G,G',G'',G, Acyl chain      |
| vaccaroside C <sup>9</sup>          | GA (C23COOH, C16-H) | Glc       | H                                                                           | G,G',G'',G                  |
| Segetoside K <sup>6</sup>           | C23COOH, C16-OH     |           | H                                                                           | G,G',G'',G                  |
| Segetoside D <sup>10</sup>          | C23H, C16-OH        |           | GlcA(Ac), Gal                                                               | Fuc(Ac), Rha, xyl; Araf(Ac) |
| Segetoside E <sup>7</sup>           | C23H, C16-OH        |           | GlcA(CH <sub>3</sub> CH <sub>2</sub> CH <sub>2</sub> CH <sub>2</sub> ), Gal | Fuc(Ac), Rha, xyl; Araf(Ac) |

**Supplementary Table 2.****List of accession numbers for Fig. 3a, Suppl. Fig. 12, and Suppl. Fig. 16**

| Gene name                                        | accession ID     |
|--------------------------------------------------|------------------|
| BfCYP716Y1-C16                                   | KC963423         |
| MtCYP716A12-C28                                  | FN995113         |
| PgCYP716A52v2-C28                                | JX036032         |
| MICYP716A75-C16                                  | KF318733         |
| MICYP87D16-C16                                   | KF318735         |
| MtCYP72A68-C23                                   | DQ335782         |
| KsCYP72A397-C23                                  | KT150517         |
| BvCYP72A552-C23                                  | MH252571         |
| CaCYP714E19-C23                                  | KT004520         |
| laCYP714E88-C23                                  | MZ508437         |
| CsIG1 ARATH                                      | NP_194132.3      |
| CsIG2 ARATH                                      | NP_567692.2      |
| CsIG3 ARATH                                      | NP_194130.3      |
| Qs scaffold 2074300                              | QS_2074300 (1kp) |
| SO scaffold 2013703                              | SO_2013703 (1kp) |
| SO scaffold 2072976                              | SO_2013976 (1kp) |
| CsIE1 ORYSJ                                      | Q651X7           |
| CsIE6 ORYSJ                                      | Q651X6           |
| CsIE2 ORYSJ                                      | Q0DXZ1           |
| CsIE1 ARATH                                      | Q8VZK9           |
| CsIB6 ARATH                                      | O23386.2         |
| CsIB1 ARATH                                      | O80898           |
| CsIH1 ORYSJ                                      | Q339N5           |
| CsIF2 ORYSJ                                      | Q84S11           |
| CsID2 ARATH                                      | Q9LFL0.1         |
| CsID3 ORYSJ                                      | Q7EZW6           |
| CsIC4 ARATH                                      | Q9LJP4.1         |
| CsIA1 ARATH                                      | Q84W54.1         |
| CsIA2 ARATH                                      | Q9FNI7.1         |
| CesA4 ORYSJ                                      | Q5JN63           |
| CESA1 ARATH                                      | O48946           |
| CESA7 ARATH                                      | Q9SWW6           |
| SOAP5                                            | XP_021842158.1   |
| PgUGT74AE2_Ginsenoside_CK-GlcT                   | A0A0A6ZFR4       |
| SvUGT74M1_Gypsogenic_acid-C28-GlcT               | ABK76266         |
| SoUGT74BB2_Medicagenic_acid_3-GlcA-28-FucT       | KNA07536.1       |
| CitLGT_Limonoid-GlcT                             | BAA93039         |
| SoUGT79K1_Yossoside_I-RhaT                       | KNA23861.1       |
| SoUGT79L2_Yossoside_II-GlcT                      | KNA13786.1       |
| GmUGT91H4_Soyasaponin_III-RhaT                   | BAI99585         |
| GmUGT73P2_Soyasapogenol_B-GlcA-GalT              | BAI99584         |
| SoUGT73BS1_Yossoside_III-XylT                    | KNA07606.1       |
| GuUGAT_Glycyrrhetic-acid-3-GAT                   | ANJ03631.1       |
| CsUGT73AM3_Cucurbitacin_3-O-glucopyranoside-GlcT | KGN59015         |



## References

1. Jia, Z., Koike, K., Kudo, M., Li, H. & Nikaido, T. Triterpenoid saponins and saponins from *Vaccaria segetalis*. *Phytochemistry* **48**, 529–536 (1998).
2. Ma, C.-H. *et al.* Cytotoxic triterpenoid saponins from *Vaccaria segetalis*. *J. Asian Nat. Prod. Res.* **10**, 177–184 (2008).
3. Balsevich, J. J., Bishop, G. G. & Ramirez-Erosa, I. Analysis of bisdesmosidic saponins in *Saponaria vaccaria* L. by HPLC-PAD-MS: identification of new quillaic acid and gypsogenin 3-O-trisaccharides. *Phytochem. Anal.* **17**, 414–423 (2006).
4. Firempong, C. K. *et al.* Segetoside I, a plant-derived bisdesmosidic saponin, induces apoptosis in human hepatoma cells in vitro and inhibits tumor growth in vivo. *Pharmacol. Res.* **110**, 101–110 (2016).
5. Sang, S.-M. *et al.* A new triterpenoid saponin with inhibition of luteal cell from the seeds of *Vaccaria segetalis*. *J. Asian Nat. Prod. Res.* **4**, 297–301 (2002).
6. Sang, S. M., Lao, A. N., Chen, Z. L., Uzawa, J. & Fujimoto, Y. Three new triterpenoid saponins from the seeds of *Vaccaria segetalis*. *J. Asian Nat. Prod. Res.* **2**, 187–193 (2000).
7. Sang, S. *et al.* Triterpenoid saponins from *Vaccaria segetalis*. *J. Asian Nat. Prod. Res.* **1**, 199–205 (1999).
8. Yun, Y. S. *et al.* Triterpenoid saponin from *Vaccaria segetalis*. *Phytochemistry* **47**, 143–144 (1998).
9. Koike, K., Jia, Z. & Nikaido, T. Triterpenoid saponins from *Vaccaria segetalis*. *Phytochemistry* **47**, 1343–1349 (1998).

10. Tian, M. *et al.* *Vaccaria segetalis*: A Review of Ethnomedicinal, Phytochemical, Pharmacological, and Toxicological Findings. *Front. Chem.* **9**, 666280 (2021).
